# Supplementary figures and images for: Design and Benchmark Testing for Open Architecture Reconfigurable Mobile Spirometer and Exhaled Breath Monitor with GPS and Data Telemetry
Source: MDPI journal article supplement (doi:10.3390/diagnostics9030100), 2019-08-21

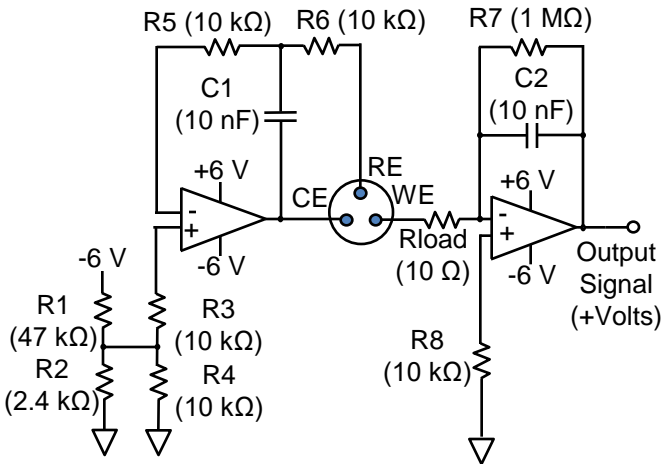

Supplement: s1 [file s1]

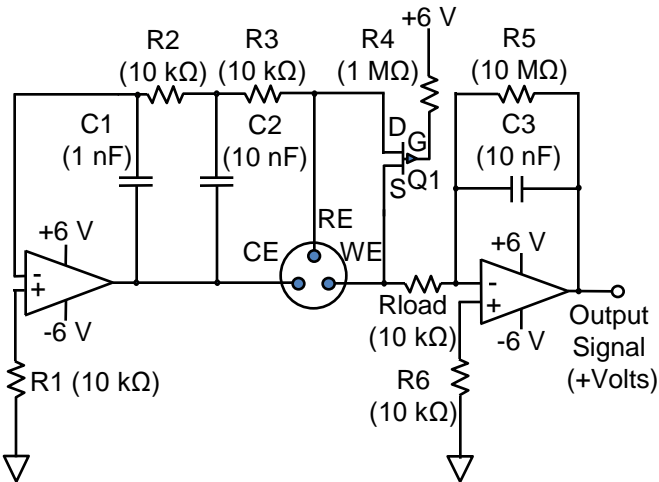

Supplement: s1 [file s1]
